# Supplementary material for: Receptor-Like Kinase LYK9 in Pisum sativum L. Is the CERK1-Like Receptor that Controls Both Plant Immunity and AM Symbiosis Development
Source: PubMed Central journal article supplement (PMC5795960; doi:10.3390/ijms19010008), 2017-12-21
Supplement: ijms-19-00008-s001.pdf [file ijms-19-00008-s001.pdf]

**Table S1. BLAST searches in different pea transcriptome databases of the *P. sativum* Lyk genes.**

| <i>Medicago truncatula</i><br><i>Mt4.0v1</i>                                                    | <i>Pisum sativum</i><br>cv. SGE<br><a href="http://blast.ncbi.nlm.nih.gov/">http://blast.ncbi.nlm.nih.gov/</a><br>(Zhukov et al., 2015) | <i>Pisum sativum</i><br>cv. Cameor<br><a href="http://bios.dijon.inra.fr/">http://bios.dijon.inra.fr/</a> | <i>Pisum sativum</i><br><a href="http://blast.ncbi.nlm.nih.gov/">http://blast.ncbi.nlm.nih.gov/</a><br>(other projects) | <i>Pisum sativum</i><br>GenBank<br>accession<br>number     |
|-------------------------------------------------------------------------------------------------|-----------------------------------------------------------------------------------------------------------------------------------------|-----------------------------------------------------------------------------------------------------------|-------------------------------------------------------------------------------------------------------------------------|------------------------------------------------------------|
| <i>MtLYK1</i><br>AY372401,<br>(Medtr5g086540)<br>XM_003616943                                   | -                                                                                                                                       | -                                                                                                         | -                                                                                                                       | -                                                          |
| <i>MtLYK2</i><br>BN001116,<br>(Medtr5g086310,<br>Medtr5g086330)<br>XM_003616924<br>XM_003616926 | -                                                                                                                                       | -                                                                                                         | GAMJ01007644<br><br>GEUU01084920                                                                                        | <i>PsK1</i><br>EU564096,<br><br><i>PsSym37</i><br>EU564088 |
| <i>MtLYK3</i><br>AY372406,<br>(Medtr5g086130)<br>XM_003616910                                   | -                                                                                                                                       | -                                                                                                         | GAMJ01007644<br><br>GEUU01084920                                                                                        | <i>PsK1</i><br>EU564096,<br><br><i>PsSym37</i><br>EU564088 |
| <i>MtLYK4</i><br>AY372407,<br>(Medtr5g086120)<br>XM_003616909                                   | GDTM01035166                                                                                                                            | PsCam010968                                                                                               | GCMK01002635<br>GCMJ01007867                                                                                            | -                                                          |
| <i>MtLYK5</i><br>BN001117,<br>(Medtr5g086090)<br>XM_003616906                                   | -                                                                                                                                       | -                                                                                                         | -                                                                                                                       | -                                                          |
| <i>MtLYK7</i><br>AY372405,<br>(Medtr5g086030)<br>XM_003616900                                   | GDTM01003580                                                                                                                            | -                                                                                                         | GEZC01028741<br>GEZC01034730<br>GCMF01025080                                                                            | -                                                          |
| <i>MtLYK8</i><br>(Medtr2g024290)<br>XM_013607437                                                | GDTM01039384                                                                                                                            | -                                                                                                         | GCMO01034719<br>GEUU01078867                                                                                            | -                                                          |
| <i>MtLYK9</i><br>(Medtr3g080050)<br>XM_003601328                                                | GDTM01035167<br>GDTL01025510                                                                                                            | -                                                                                                         | GEZC01062852                                                                                                            | -                                                          |
| <i>MtLYK10</i><br>(Medtr5g033490)<br>XM_003613117                                               | GDTM01015333                                                                                                                            | PsCam036987                                                                                               | GCMK01009418                                                                                                            | -                                                          |

**Table S2.** List of primers.

| Gene            | Product                                                                 | Primers                                                             |
|-----------------|-------------------------------------------------------------------------|---------------------------------------------------------------------|
| <i>PsLyk9</i>   | LysM-receptor-like kinase                                               | F - TCCACTATGCTAATTTAACCAATGTTC<br>R - TCGCAAGTATCCAAAATATACACCAG   |
| <i>PR1</i>      | Disease resistance protein                                              | F - GGGGTCCATATGGTGAGAAC<br>R - TAATAACCAGGTGGATCATAGTTACA          |
| <i>PR10</i>     | Disease resistance protein PR10-1 (DRR49a), Putative RNase              | F - GCCGGAACCATCAAGAACT<br>R - GCCTTGAAAAGACCATCACCC                |
| <i>PAL1</i>     | Phenylalanine ammonium lyase 1                                          | F - TGAGAATCAACACACTTCTCCAAGG<br>R - GCATTAAGAATTTCCCCAGAGGTC       |
| <i>PAL2</i>     | Phenylalanine ammonium lyase 2                                          | F - TGAGAATCAACACACTTCTCCAAGG<br>R - AGCATTAAGTATTTCTCCAGACGGTC     |
| <i>AM1</i>      | Putative peroxidase                                                     | F - TGCTAGCTAGCACTGCTCTACTA<br>R - GCTAGCGAGTACGCTACGGG             |
| <i>AM3</i>      | Unknown protein                                                         | F - TGCTAGCTACGATCGACTCGTGCC<br>R - TAGCTAATCTTAGCGCGTTATGC         |
| <i>AM5</i>      | Putative proteinase                                                     | F - GTATTCGGGCTATTGTATTCGCGT<br>R - ATCTCGCGTATTTGCGCGATTTC         |
| <i>DRR 232a</i> | Disease resistance protein DRR 232a                                     | F - CGTATTACGGGCTATAGCGGTCT<br>R - GCTATTAGCGGCAATTATCTGGTGT        |
| <i>GST</i>      | Glutathione-S-transferase                                               | F - CGATCTTATCGGTTCGCATGTCTGT<br>R - GCTACATCGGGTATTCGTCGATTTC      |
| <i>PT4</i>      | Inorganic phosphate transporter 4                                       | F - CATTCTGAGCTGATCGTCGTATGGTG<br>R - GCATTAAGAATTTCCCCAGAGGTC      |
| <i>DWARF27</i>  | Iron-containing protein required for the biosynthesis of strigolactones | F - GTATTATTATGCTCGCCCCTAGCTAC<br>R - TATTATATCGGCGGTACTACTGCAC     |
| <i>DELLA</i>    | DWARF8-like GAI protein                                                 | F - TCGTAGCGACATCCTCTCTCTACTAGG<br>R - TGCATGCCTGGCCTATTTATACGCTTCG |
| <i>NSP1</i>     | GRAS family transcription factor                                        | F - TATTGCTACGTCTAGTAGTCTTAGCTG<br>R - GCTACTAGCGTCTCATCTAGCTAACC   |
| <i>NSP2</i>     | GRAS family transcription factor                                        | F - TACGTACTCCTGGGTAGCTGCTGTAC<br>R - TCGTACGTCGTACGTACGTAGCTGA     |
| <i>RAM1</i>     | GRAS family                                                             | F - TTAGCTGTACGTACGTACGTACGTAGTC                                    |

|               |                                      |                                                                 |
|---------------|--------------------------------------|-----------------------------------------------------------------|
|               | transcription factor                 | R - TCGTACGCCTTCTGAGTCTCTAGGGTC                                 |
| <i>Myb-TF</i> | Myb- transcription factor            | F - GCTACGTGGCGCTATATATCGGGC<br>R - TGGCCTATCGTACTCCGTTTAGG     |
| <i>RAM2</i>   | Glycerol-3-phosphate acyltransferase | F - GCTACTATTAAATTCTCCCTTCGCCG<br>R - CTAGCTGTAGCTATATACCTACTTG |
